# Supplementary material
Source: Springer Nature journal article supplement (https://www.springermedizin.de/resource/supplementary/12955_2012_1046_MOESM3_ESM.pdf/9558656)

Standard Error

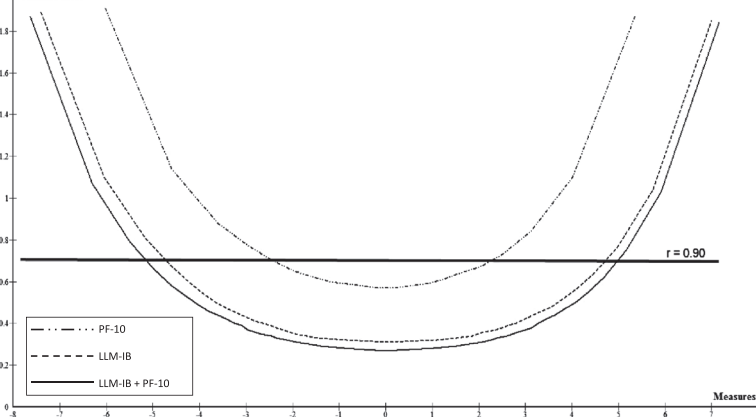

$r = 0.90$

Legend:  
- . . . PF-10  
- - - LLM-IB  
- - - LLM-IB + PF-10

Measures

Supplement: MOESM3 [file 9558656]
